# Supplementary material
Source: MDPI journal article supplement (https://www.mdpi.com/2073-445X/11/11/1881)
Supplement: s1 [file s1]

## Supplementary materials

**Table S1** Field management for CT and NT during 2014–2016.

| Management                | 2014                                            | 2015                                           | 2016                                           |
|---------------------------|-------------------------------------------------|------------------------------------------------|------------------------------------------------|
| Maize Cultivar            | XDH78                                           | XDH78                                          | XDH78                                          |
| Tillage Date              | 15–Apr                                          | 15–Apr                                         | 18–Apr                                         |
| Tillage depth             | 30 cm                                           | 30 cm                                          | 30 cm                                          |
| Fertilization date        | 17–Apr                                          | 8–May                                          | 27–Apr                                         |
| Fertilization application | N: 257 Kg·ha <sup>-1</sup>                      | N: 257 Kg·ha <sup>-1</sup>                     | N: 257 Kg·ha <sup>-1</sup>                     |
|                           | P: 105 Kg·ha <sup>-1</sup>                      | P: 105 Kg·ha <sup>-1</sup>                     | P: 105 Kg·ha <sup>-1</sup>                     |
|                           | K:15 Kg·ha <sup>-1</sup>                        | K:15 Kg·ha <sup>-1</sup>                       | K:15 Kg·ha <sup>-1</sup>                       |
| Planting date             | 20–Apr                                          | 20–May                                         | 6–May                                          |
| Planting density          | 50000 seed ha <sup>-1</sup>                     | 50000 seed ha <sup>-1</sup>                    | 50000 seed ha <sup>-1</sup>                    |
| Row spacing               | 90 cm                                           | 90 cm                                          | 90 cm                                          |
| In-row spacing            | 40 cm                                           | 40 cm                                          | 40 cm                                          |
| Weed control              | Thifensulfuron-methyl (120 g ha <sup>-1</sup> ) | Thifensulfuron-methyl(120 g ha <sup>-1</sup> ) | Thifensulfuron-methyl(120 g ha <sup>-1</sup> ) |
| Harvest date              | 10–Sep                                          | 7–Oct                                          | 3–Oct                                          |

Note: Information of Tillage Date and Tillage depth are for CT.

**Table S2** Statistical evaluations of measured and simulated soil water content in different layers for CT and NT during 2014–2016.

| Depth<br>(cm) | Year | CT                                               |                                                 |             |          |          | NT                                               |                                                 |             |          |          |
|---------------|------|--------------------------------------------------|-------------------------------------------------|-------------|----------|----------|--------------------------------------------------|-------------------------------------------------|-------------|----------|----------|
|               |      | Simulated<br>(cm <sup>3</sup> cm <sup>-3</sup> ) | Measured<br>(cm <sup>3</sup> cm <sup>-3</sup> ) | <i>RMSE</i> | <i>d</i> | <i>E</i> | Simulated<br>(cm <sup>3</sup> cm <sup>-3</sup> ) | Measured<br>(cm <sup>3</sup> cm <sup>-3</sup> ) | <i>RMSE</i> | <i>d</i> | <i>E</i> |
| 10            | 2014 | 0.12                                             | 0.10                                            |             |          |          | 0.14                                             | 0.12                                            |             |          |          |
|               | 2015 | 0.15                                             | 0.13                                            | 0.07        | 0.88     | 0.02     | 0.15                                             | 0.10                                            | 0.08        | 0.81     | 0.03     |
|               | 2016 | 0.10                                             | 0.09                                            |             |          |          | 0.10                                             | 0.08                                            |             |          |          |
| 30            | 2014 | 0.15                                             | 0.14                                            |             |          |          | 0.15                                             | 0.12                                            |             |          |          |
|               | 2015 | 0.19                                             | 0.15                                            | 0.06        | 0.80     | 0.02     | 0.19                                             | 0.14                                            | 0.06        | 0.83     | 0.04     |
|               | 2016 | 0.13                                             | 0.11                                            |             |          |          | 0.13                                             | 0.12                                            |             |          |          |
| 50            | 2014 | 0.11                                             | 0.09                                            |             |          |          | 0.11                                             | 0.11                                            |             |          |          |
|               | 2015 | 0.15                                             | 0.10                                            | 0.09        | 0.42     | 0.03     | 0.15                                             | 0.14                                            | 0.05        | 0.90     | 0.00     |
|               | 2016 | 0.10                                             | 0.10                                            |             |          |          | 0.10                                             | 0.13                                            |             |          |          |
| 70            | 2014 | 0.11                                             | 0.07                                            |             |          |          | 0.09                                             | 0.08                                            |             |          |          |
|               | 2015 | 0.15                                             | 0.11                                            | 0.07        | 0.73     | 0.03     | 0.15                                             | 0.13                                            | 0.05        | 0.89     | 0.01     |
|               | 2016 | 0.10                                             | 0.10                                            |             |          |          | 0.10                                             | 0.10                                            |             |          |          |
| 90            | 2014 | 0.10                                             | 0.09                                            |             |          |          | 0.08                                             | 0.06                                            |             |          |          |
|               | 2015 | 0.14                                             | 0.12                                            | 0.06        | 0.81     | 0.01     | 0.14                                             | 0.12                                            | 0.03        | 0.95     | 0.02     |
|               | 2016 | 0.10                                             | 0.09                                            |             |          |          | 0.10                                             | 0.10                                            |             |          |          |
